# Supplementary material for: Design, Modeling and Synthesis of 1,2,3-Triazole-Linked Nucleoside-Amino Acid Conjugates as Potential Antibacterial Agents
Source: MDPI journal article supplement (doi:10.3390/molecules22101682), 2017-10-10
Supplement: s1 [file s1]

## Supplementary Material

# Design, Modeling and Synthesis of 1,2,3-Triazole-linked Nucleoside-Amino Acid Conjugates as Potential Antibacterial Agents

Sarah N. Malkowski, Carolyn F. Dishuck, Gene G. Lamanilao, Carter P. Embry, Christopher S. Grubb, Omair Arain, Mauricio Cafiero and Larry W. Peterson \*

Department of Chemistry, Rhodes College, 2000 North Parkway, Memphis, TN 38112;

\* Correspondence: petersonl@rhodes.edu; Tel.: +01-901-843-3545

**Table S1.** Reagents and results for the formation of the acyclic tosylate, **6**

| <b>Trial</b> | <b>Reagents</b>                   | <b>Reaction Conditions</b> | <b>Workup and purification</b>                                                                                                        | <b>Result</b>  |
|--------------|-----------------------------------|----------------------------|---------------------------------------------------------------------------------------------------------------------------------------|----------------|
| <b>1</b>     | <b>5</b> , TsCl, pyr              | 0° C to rt, 16 h           | Added MeOH, Conc.<br>Column 1: CH <sub>2</sub> Cl <sub>2</sub> :MeOH<br>Column 2: Hex:EtOAc                                           | 12%            |
| <b>2</b>     | <b>5</b> , TsCl, pyr              | 0° C to rt, 17.25 h        | Diluted with CH <sub>2</sub> Cl <sub>2</sub><br>Wash: HCl, brine<br>Column: CH <sub>2</sub> Cl <sub>2</sub> :MeOH                     | 9%             |
| <b>3</b>     | <b>5</b> , Ts <sub>2</sub> O, pyr | 0° C to 35° C, 4.5 h       | Diluted with CH <sub>2</sub> Cl <sub>2</sub><br>Wash: HCl, brine, NaHCO <sub>3</sub><br>Column: CH <sub>2</sub> Cl <sub>2</sub> :MeOH | 23%            |
| <b>4</b>     | <b>5</b> , Ts <sub>2</sub> O, pyr | 0° C to rt, 16.5 h         | Diluted with CH <sub>2</sub> Cl <sub>2</sub><br>Wash: HCl, brine, NaHCO <sub>3</sub>                                                  | 0%             |
| <b>5</b>     | <b>5</b> , TsCl, pyr              | 0° C to rt, 14.75 h        | Conc.<br>Column 1: CH <sub>2</sub> Cl <sub>2</sub> :MeOH<br>Column 2: CH <sub>2</sub> Cl <sub>2</sub> :MeOH                           | 56%,<br>impure |

CE052517\_LOTS

Sample Name CE052517\_LOTS  
Date collected 2017-05-25

Pulse sequence gCOSY  
Solvent dmsd

Temperature 25  
Spectrometer 400NMR-vnmrs400

Study owner larryn  
Operator larryn

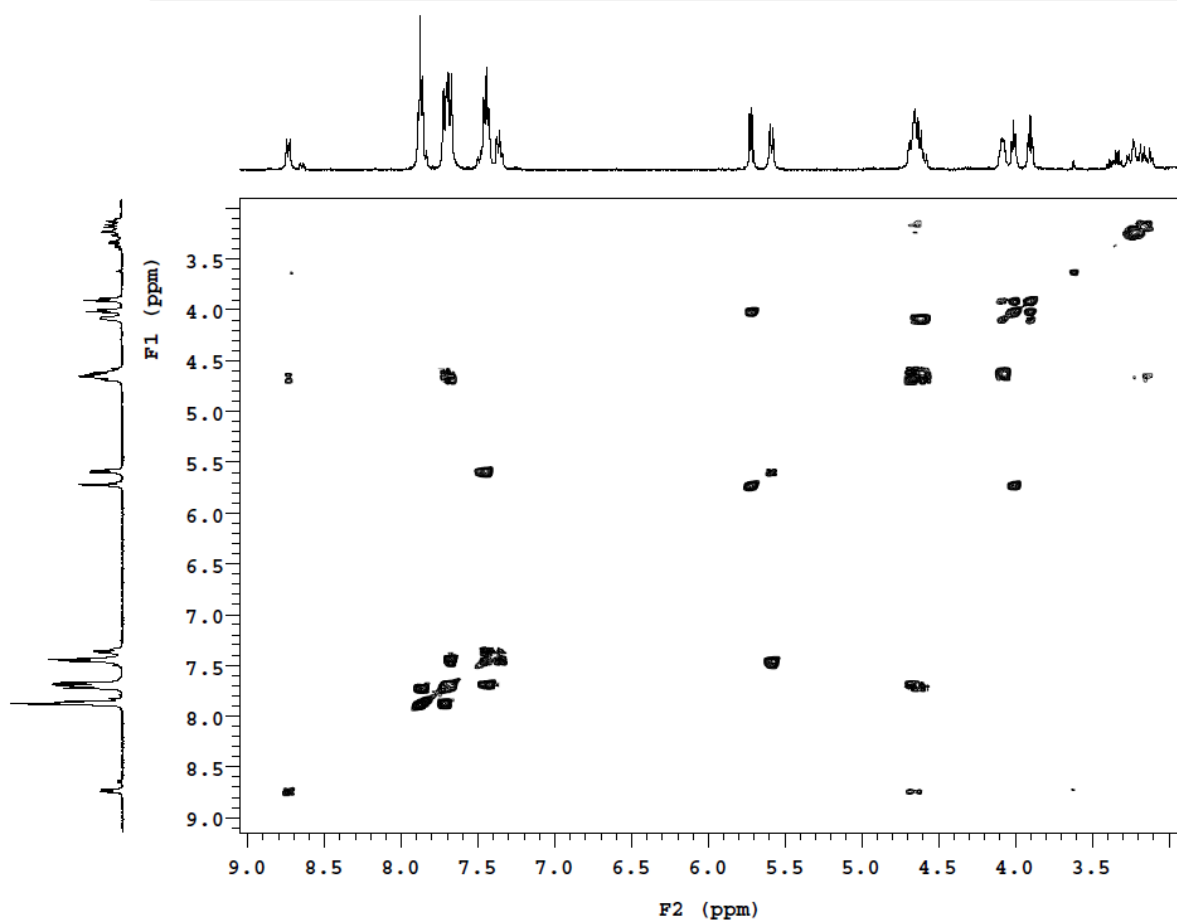

LPSAMPLE2\_NOESY

|                |                 |                |       |              |                 |             |         |
|----------------|-----------------|----------------|-------|--------------|-----------------|-------------|---------|
| Sample Name    | LPSAMPLE2_NOESY | Pulse sequence | NOESY | Temperature  | 25              | Study owner | mosleyk |
| Date collected | 2017-05-26      | Solvent        | dmsd  | Spectrometer | 400NMR-vnmrs400 | Operator    | mosleyk |

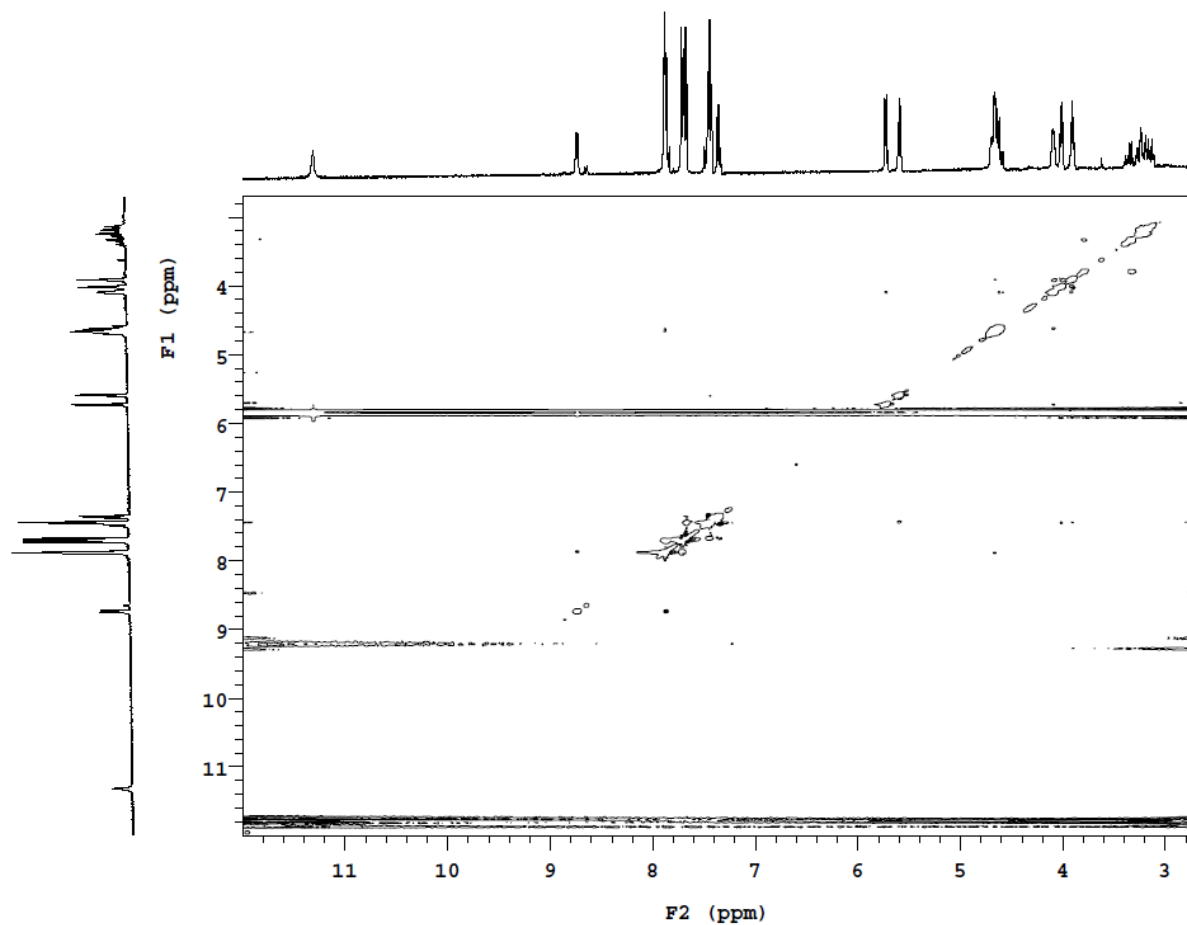

Figure S2. NOESY spectrum of 4.
